# Supplementary material
Source: PubMed Central journal article supplement (PMC3231832)

**Supplemental Table S1: Sequences of the oligonucleotides used for this study**

| <b>Methylation analyses</b>                      |                                                                                 |                                                         |
|--------------------------------------------------|---------------------------------------------------------------------------------|---------------------------------------------------------|
| mGlut4bi1Fornest<br>mGlut4bi1For<br>mGlut4bi1Rev | TTTGTTTTTTGGGTTTTTTTAAAGA<br>AATATCCCAACCTATCCCAAAC<br>TTTTTTTTGAATTGAGTTTTTTTT | PCR<br>amplification                                    |
| mGlut41_seq1<br>mGlut41_seq2                     | GGATGGGTTAGTAGGTA<br>GTTTTTAGATATATTAGGA                                        | Pyrosequencing                                          |
| mGlut4RT_for<br>mGlut4RT_rev                     | CCCTTTAAGGCTCCATCTCC<br>TGTGTGTATGCCCCGAAGTA                                    | Real time PCR<br>after Faul                             |
| mSHIPprom_for<br>mSHIPprom_rev                   | CATGGAAATGGGCATCAATA<br>AAAGTGATAGCAAGGCCACG                                    | Real time PCR<br>after Faul                             |
| <b>ChIP analyses</b>                             |                                                                                 |                                                         |
| mGlut4ChIP1For<br>mGlut4ChIP1Rev                 | CCTGTCCCTTGGGTCCCCTCCAAGA<br>GGTGTCCCAGCCTGTCCCAGGC                             | Conventional<br>PCR                                     |
| mGlut4ChIPRTFor<br>mGlut4ChIPRTRev               | CCCTTTAAGGCTCCATCTCC<br>TGTGTGTATGCCCCGAAGTA                                    | Real time PCR                                           |
| mGlut4_4ChIPRTFor<br>mGlut4_4ChIPRTRev           | GTGGGTTGTGGCAGTGAGTCCCACCA<br>GAAAACTGGACCAGATTTCCCAAT                          | Real time PCR                                           |
| mDag1ChIPFor<br>mDag1ChIPRev                     | AGCTACCCGGACTGGCTAAG<br>GCACCTCTCTGCCATT                                        | Real time PCR                                           |
| mLactoferinChIPFor<br>mLactoferinChIPRev         | TCTAGGCTGACTCCGCTCTC<br>TAGAGGTGGGACATGGGGTA                                    | Conventional and<br>real time PCR                       |
| <b>Gene expression analyses</b>                  |                                                                                 |                                                         |
| 18SFor<br>18SRev                                 | CGGCTACCACATCCAAGGAA<br>GCTGGAATTACCGCGGCT                                      |                                                         |
| maP2For<br>maP2Rev                               | TGGAAGACAGCTCCTCCTCG<br>AATCCCATTACGCTGATGATC                                   |                                                         |
| mLXR $\alpha$ For<br>mLXR $\alpha$ Rev           | GCAGGAGATTGTTGACTTTGC<br>GTCCTCCCTGCTGAGCTGTA                                   |                                                         |
| mGlut4For<br>mGlut4Rev                           | TCATTGTTCGGCATGGGTTTC<br>CGGCAAATAGAAGGAAGACGTA                                 |                                                         |
| hER $\beta$ For<br>hER $\beta$ Rev               | TGGAGTCTGGTCGTGTGAAG<br>CTCTTGCGCCGGTTTTTAT                                     |                                                         |
| <b>Gelshift assays</b>                           |                                                                                 |                                                         |
| Sp1cont_for<br>Sp1cont_rev                       | ACGTTGCAGCCGGGGCGGGGCTTCTGCA<br>TGCAGAAGCCCCGCCCCGGCTGCAACGT                    | Sp1 control<br>sequence (Karin<br>et al., PNAS<br>1989) |
| Seq1_for<br>Seq1_rev                             | CCTTTGCCCTCCCCGCCTGGGACAGGC<br>GCCTGTCCCAGGCGGGGGAGGGCAAAGG                     |                                                         |
| Seq1mut_for<br>Seq1mut_rev                       | CCTTTGCCCTATTATGCCTGGGACAGGC<br>GCCTGTCCCAGGCATAATAGGGCAAAGG                    | Mutated Sp1 and<br>RXR binding site                     |
| Seq1mutSp1_for<br>Seq1mutSp1_rev                 | CCTTTGCCCTCCTATGCCTGGGACAGGC<br>GCCTGTCCCAGGCATAGGAGGGCAAAGG                    | Mutated Sp1<br>binding site                             |
| Seq7_for<br>Seq7_rev                             | TCGCGGACCCTTAAAGGCTCCATCTCT<br>AGGAGATGGAGCCTTAAAGGGTCCGCGA                     |                                                         |

**Supplemental Figure S1.**

**A:** Bisulfite-Pyrosequencing of unmethylated and methylated DNA, and different ratios thereof. 5-AZA-dC treated genomic DNA from MEFs (0% methylation) and Universal Methylated Mouse DNA (100% methylation) were bisulfite treated, PCR amplified, and mixed in ratios 4:1 (25% methylation), 1:1 (50% methylation), and 1:4 (75% methylation). The DNA was analysed by Pyrosequencing and results blotted versus the expected percentage of methylation.

**B:** DNA methylation at CpG11 in wt, erko, and berko MEFs derived from three different mice, assessed by bisulfite-Pyrosequencing.

**C:** Methylation analysis by methylation sensitive restriction enzyme digest using FauI, followed by real time PCR for *Glut4*. Genomic DNA of wt, erko, and berko MEFs was subjected to FauI digest. Subsequently, the amount of uncut *Glut4* promoter was determined using real time PCR. The results were normalized to *18S* rRNA or *SHIP* promoter, which both do not exhibit a FauI recognition site. Percent methylation was calculated by generating a standard curve using FauI digested unmethylated and methylated DNA, and different ratios thereof.

**Supplemental Figure S2.**

ER $\alpha$  recruitment to the ERE on the *lactoferrin* promoter in wt MEFs. Cells were treated with 10 nM E2 for 45 min. ChIPs were analysed by real time PCR and results were normalized to inputs and recruitment in erko MEFs. Data are represented as mean + SD.

# Suppl. Figure 1

**A**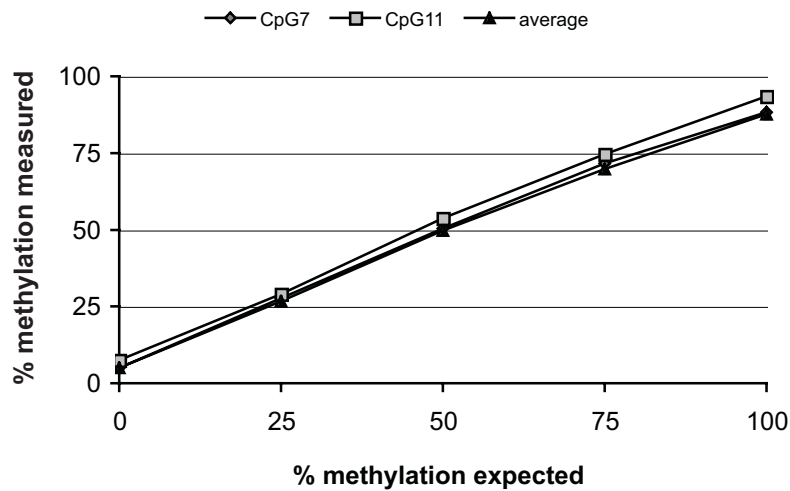**B**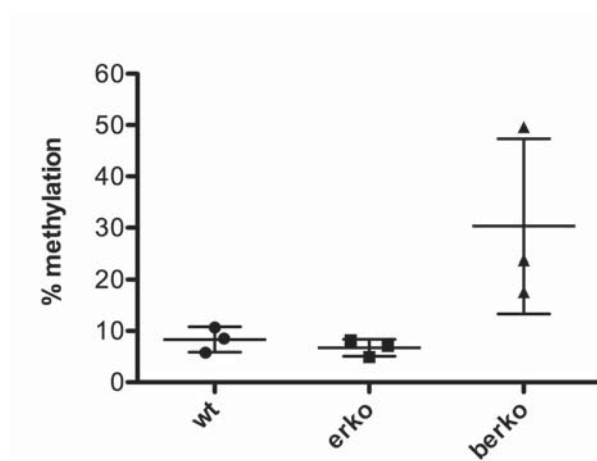**C**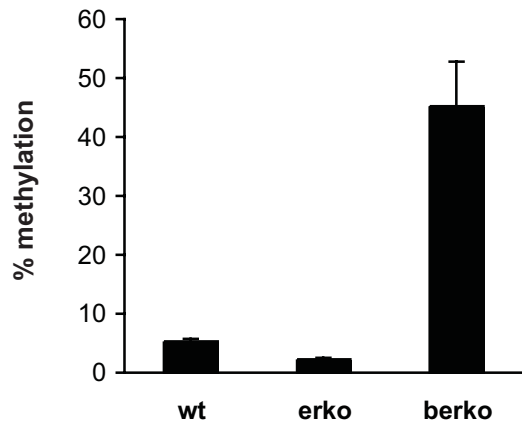

# Suppl. Figure 2

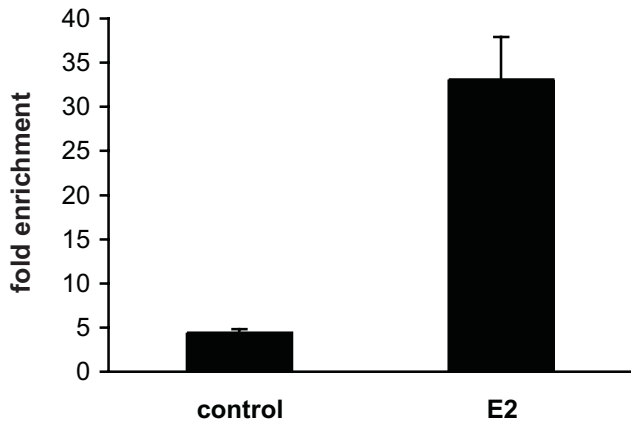

Supplement: supp_me.2011-1054_me-11-1054_Supplemental_material.pdf [file supp_me.2011-1054_me-11-1054_Supplemental_material.pdf]
